# Supplementary material for: Novel Triarylamine-Based Hole Transport Materials: Synthesis, Characterization and Computational Investigation
Source: MDPI journal article supplement (doi:10.3390/ma14113128), 2021-06-07
Supplement: s1 [file s1]

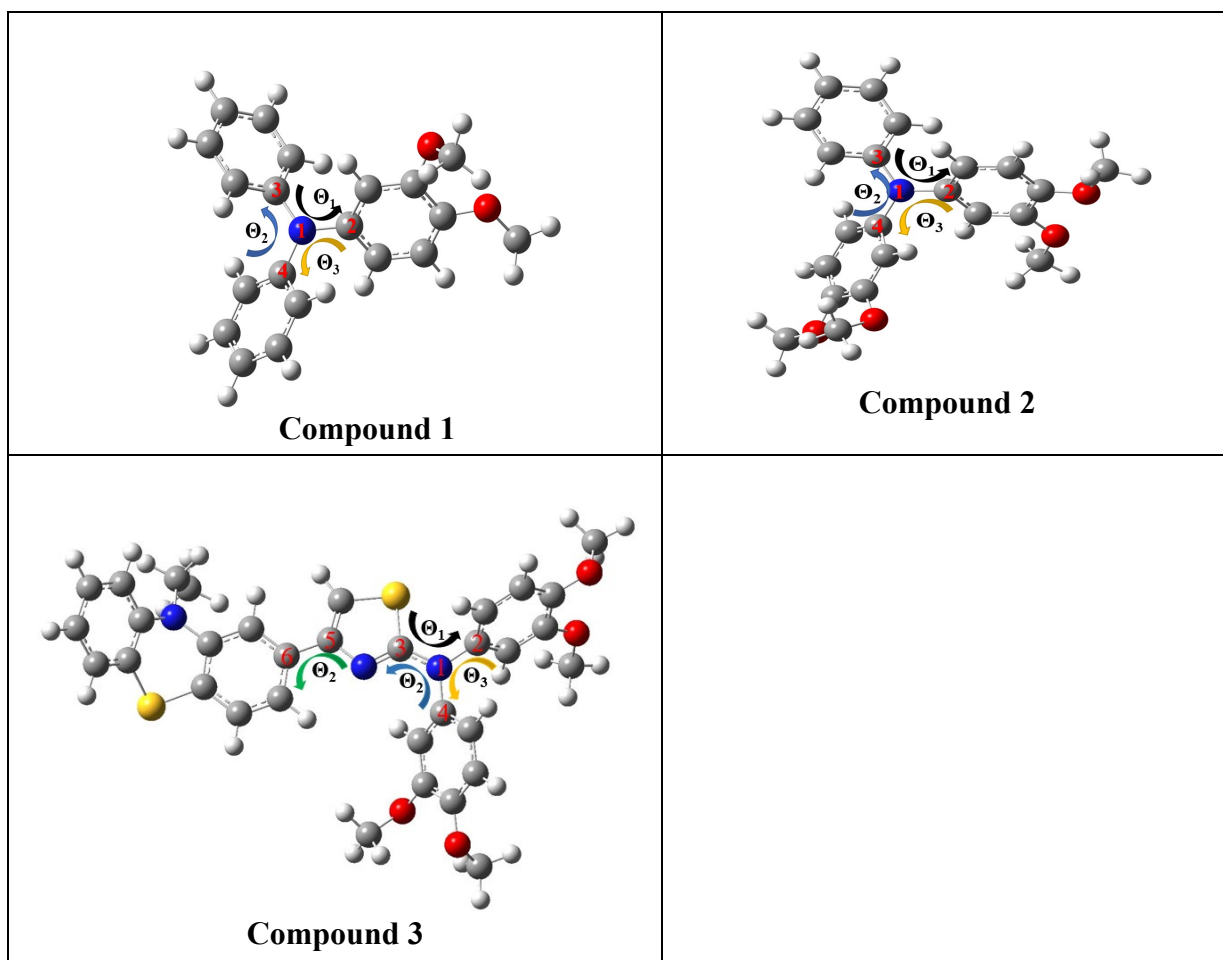

**Figure S1.** The chemical construction of the investigated molecules.

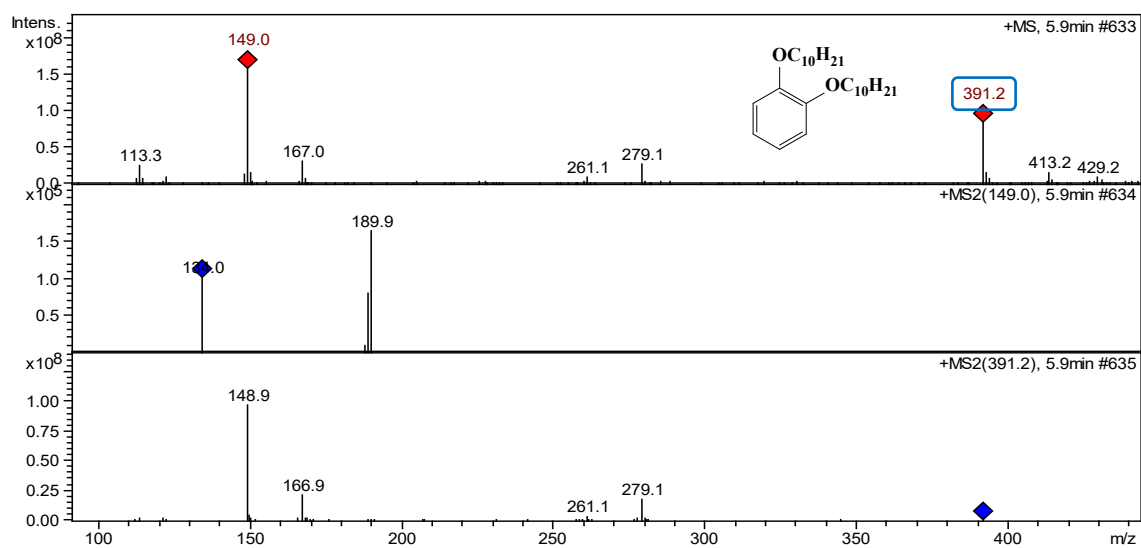

**Figure S2.** Mass spectrum of B1.

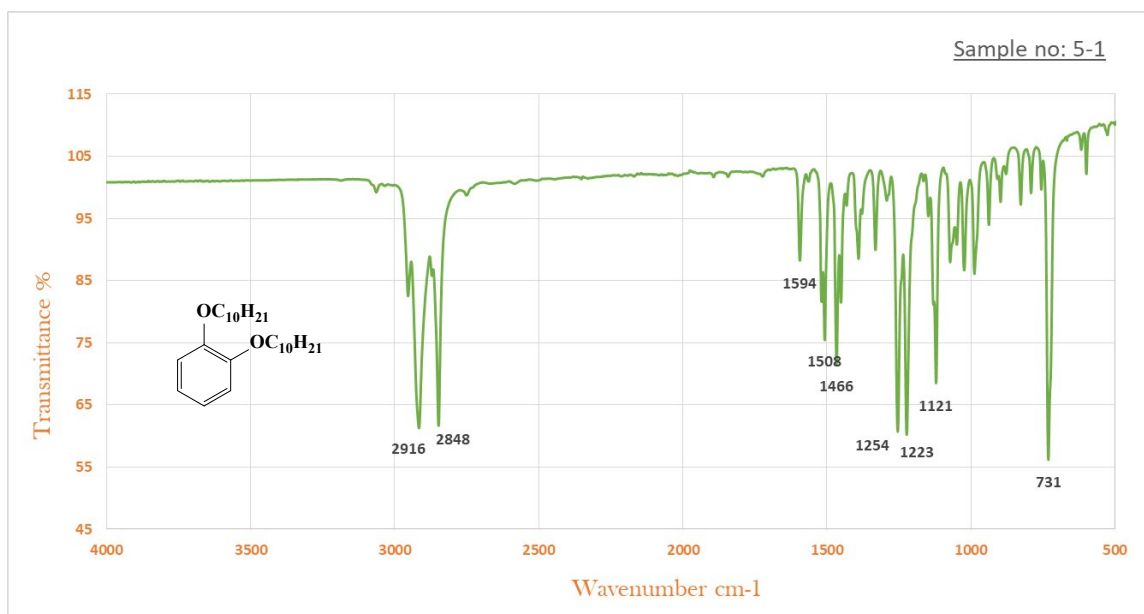

**Figure S3.** IR spectrum of B1.

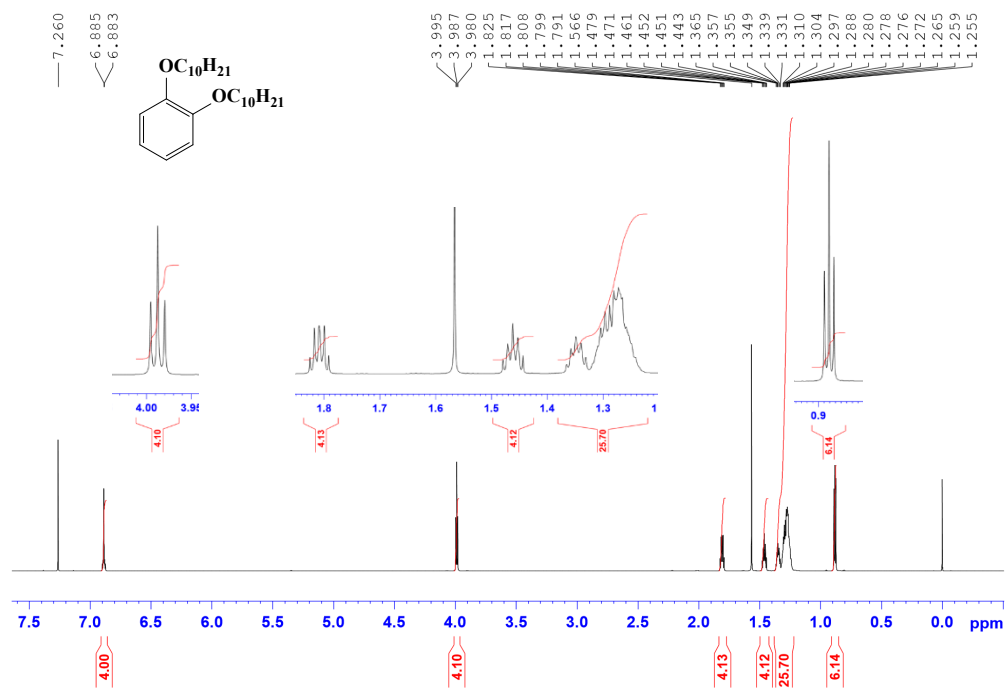

Figure S4. <sup>1</sup>H NMR (CDCl<sub>3</sub>) spectrum of B1.

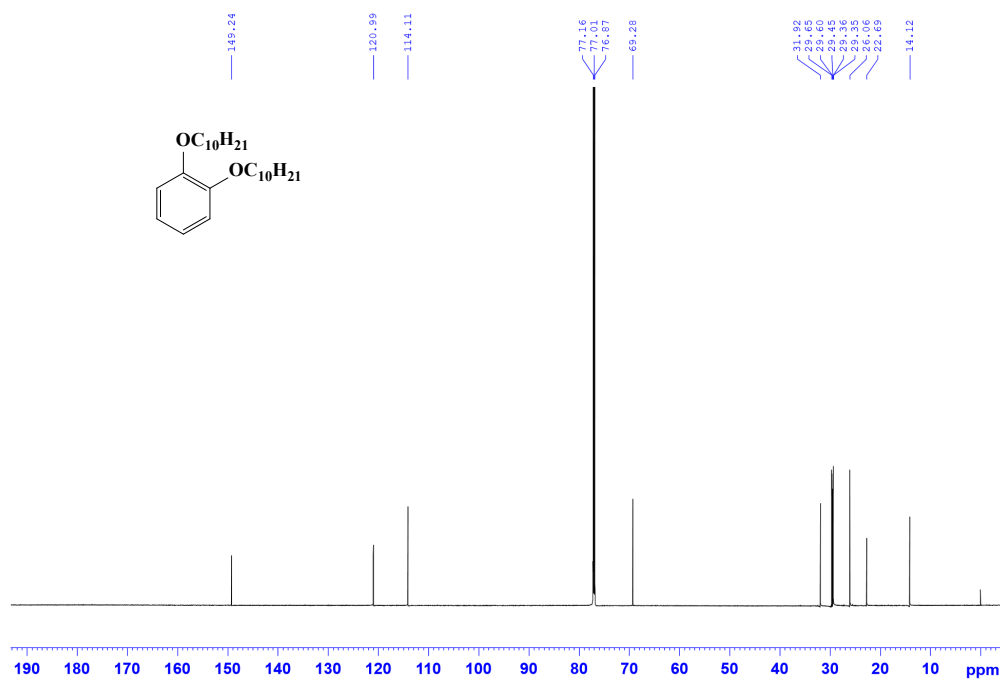

Figure S5. <sup>13</sup>C NMR (CDCl<sub>3</sub>) spectrum of B1.

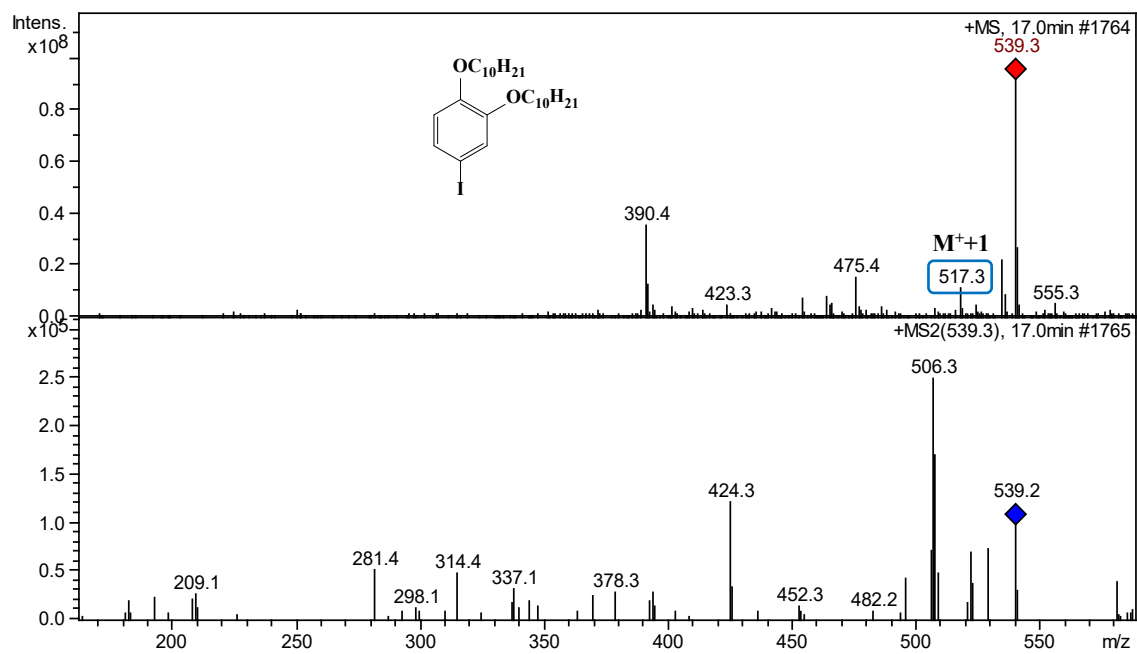

Figure S6. Mass spectrum of B2.

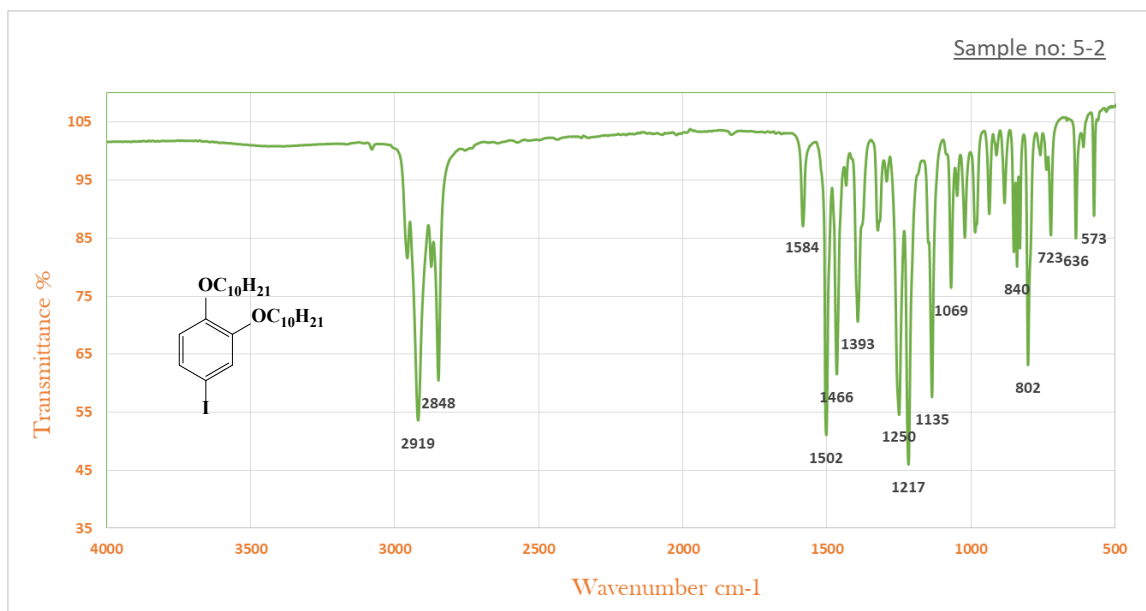

Figure S7. IR spectrum of B2.

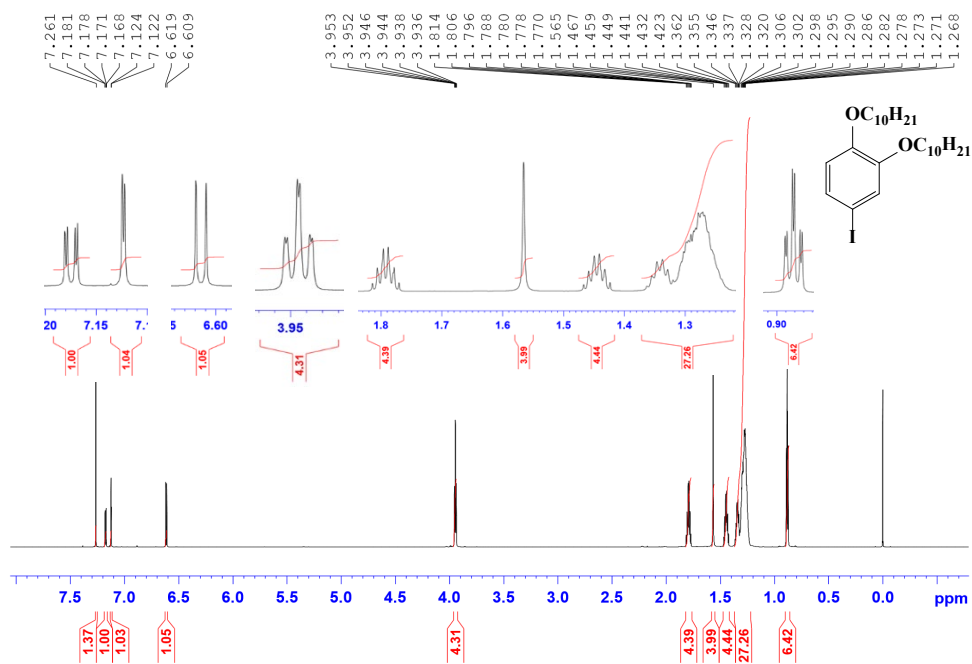

**Figure S8.** <sup>1</sup>H NMR (CDCl<sub>3</sub>) spectrum of **B2**.

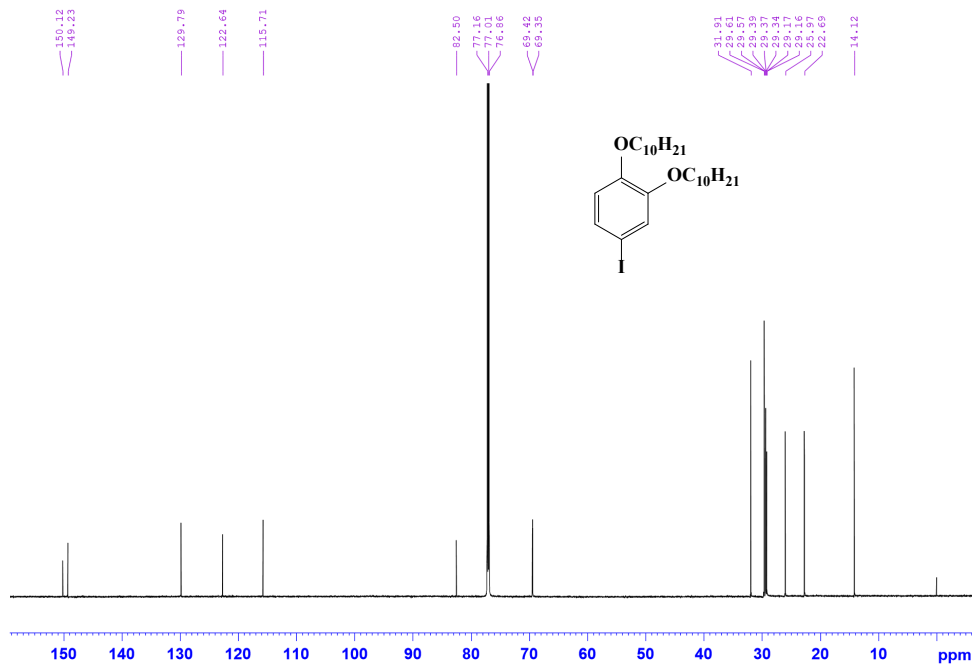

**Figure S9.** <sup>13</sup>C NMR (CDCl<sub>3</sub>) spectrum of **B2**.

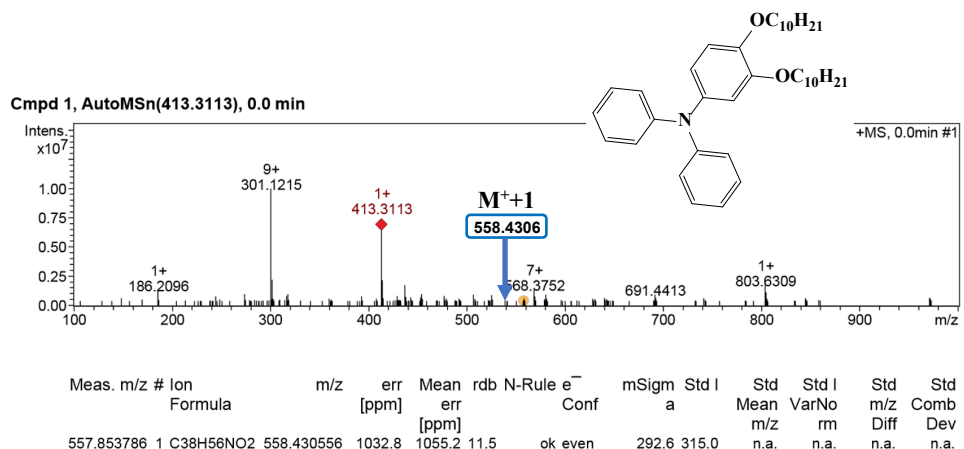

**Figure S10.** High resolution mass spectrum of **compound 1**.

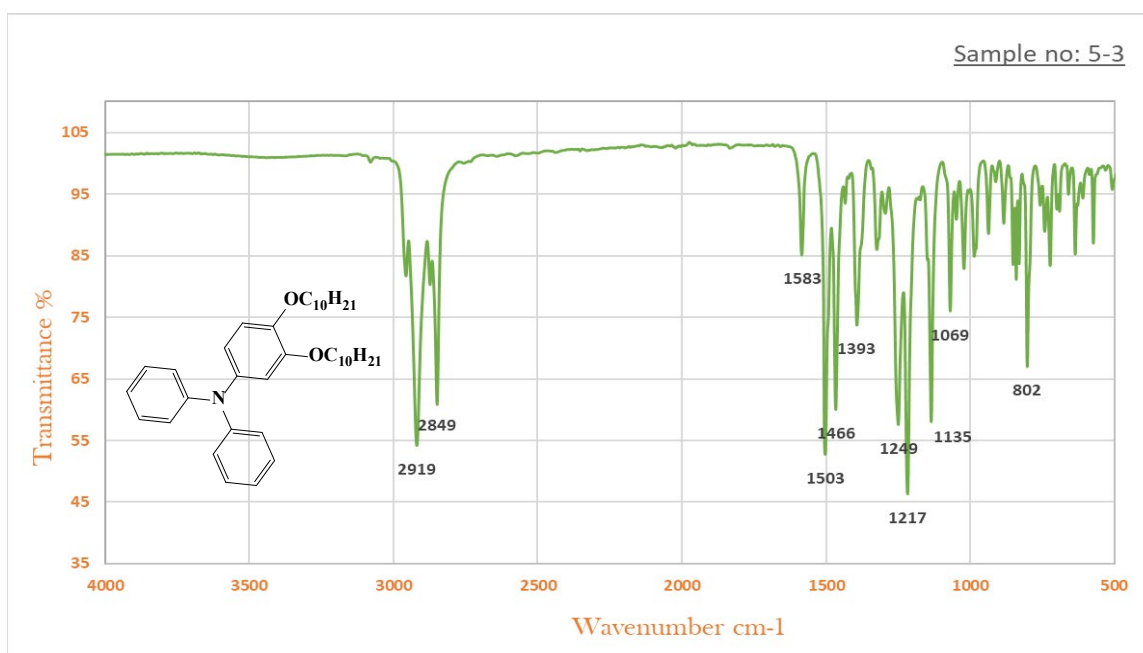

**Figure S11.** IR spectrum of **compound 1**.

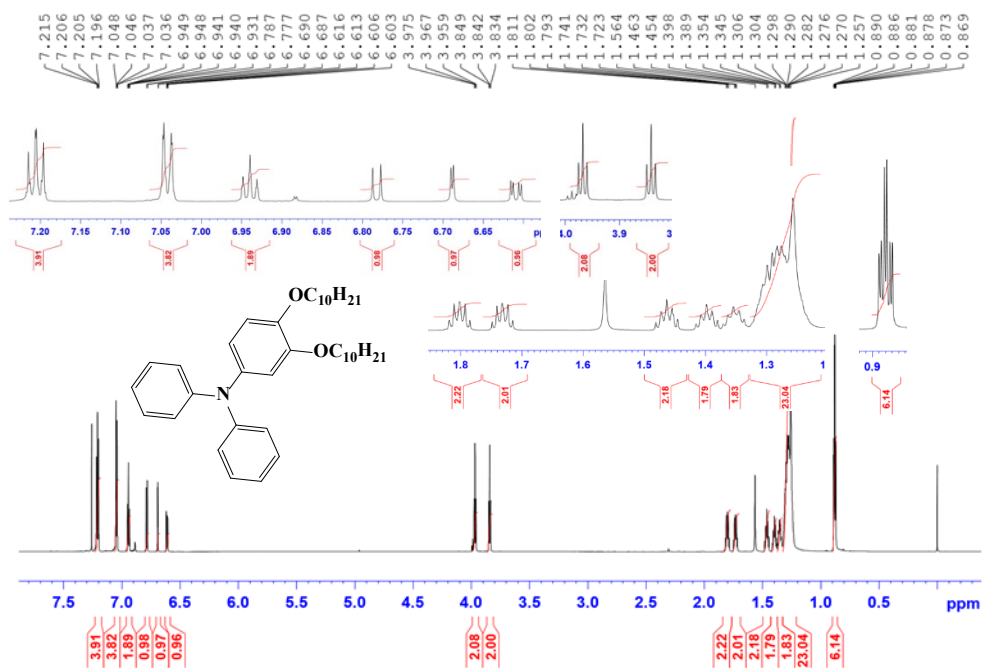

Figure S12. <sup>1</sup>H NMR (CDCl<sub>3</sub>) spectrum of **compound 1**.

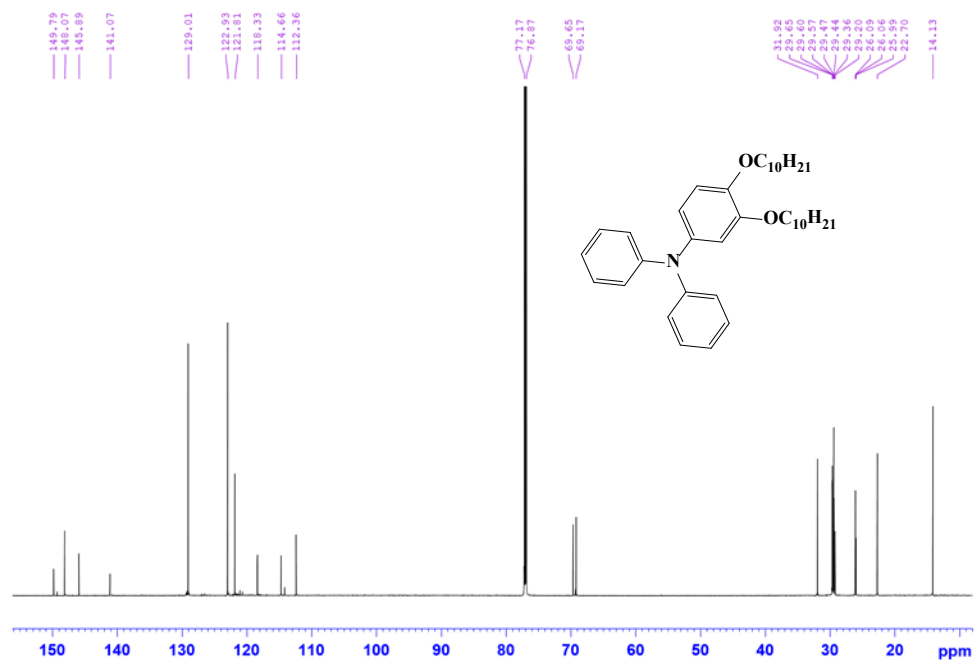

Figure S13. <sup>13</sup>C NMR (CDCl<sub>3</sub>) spectrum of **compound 1**.

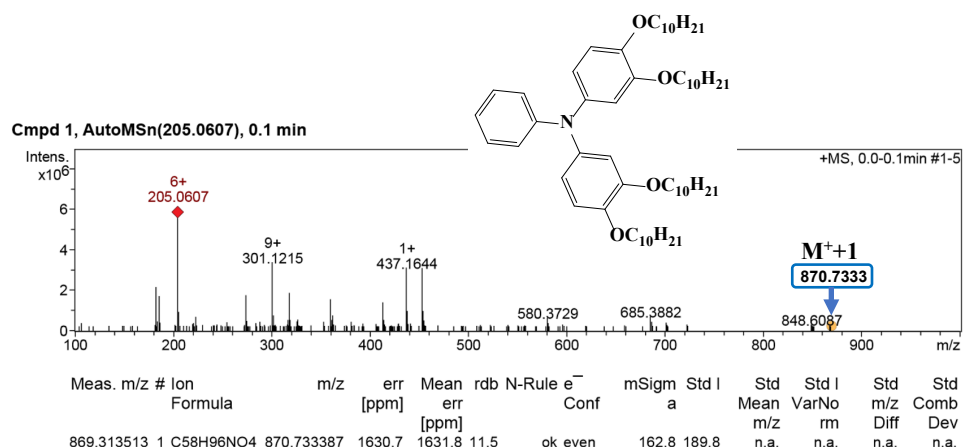

Figure S14. High resolution mass spectrum of compound 2.

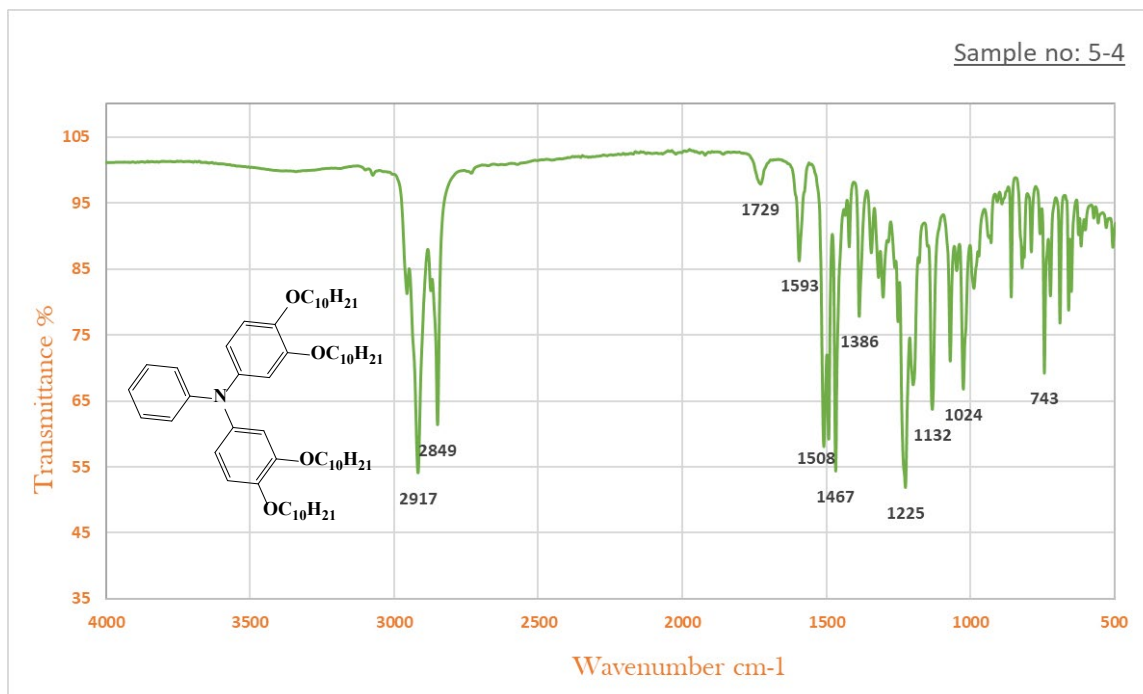

Figure S15. IR spectrum of compound 2.



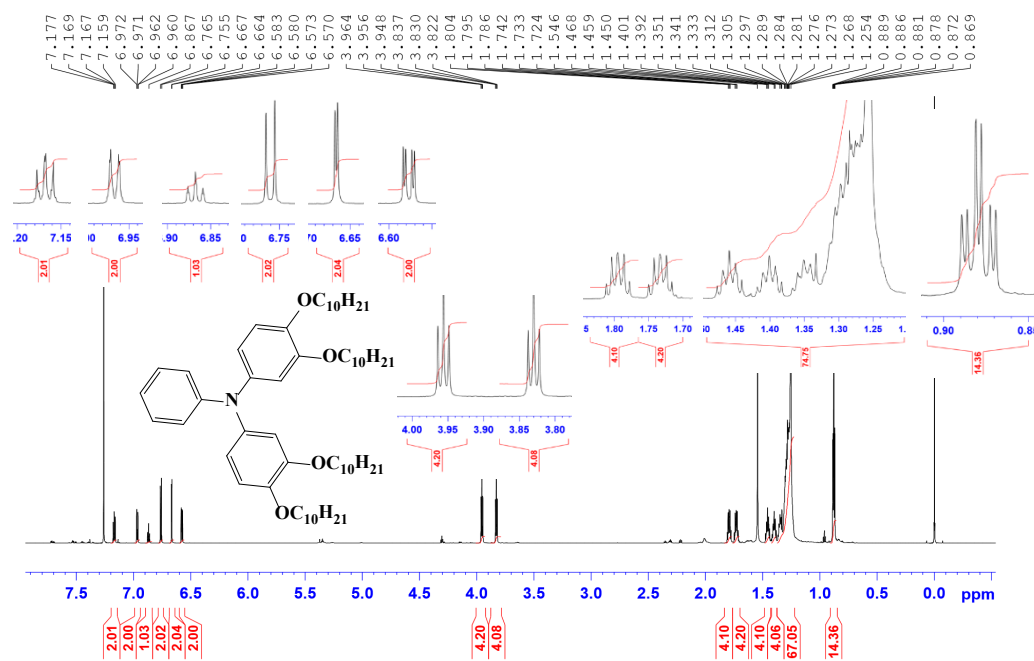

Figure S16. <sup>1</sup>H NMR (CDCl<sub>3</sub>) spectrum of compound 2.

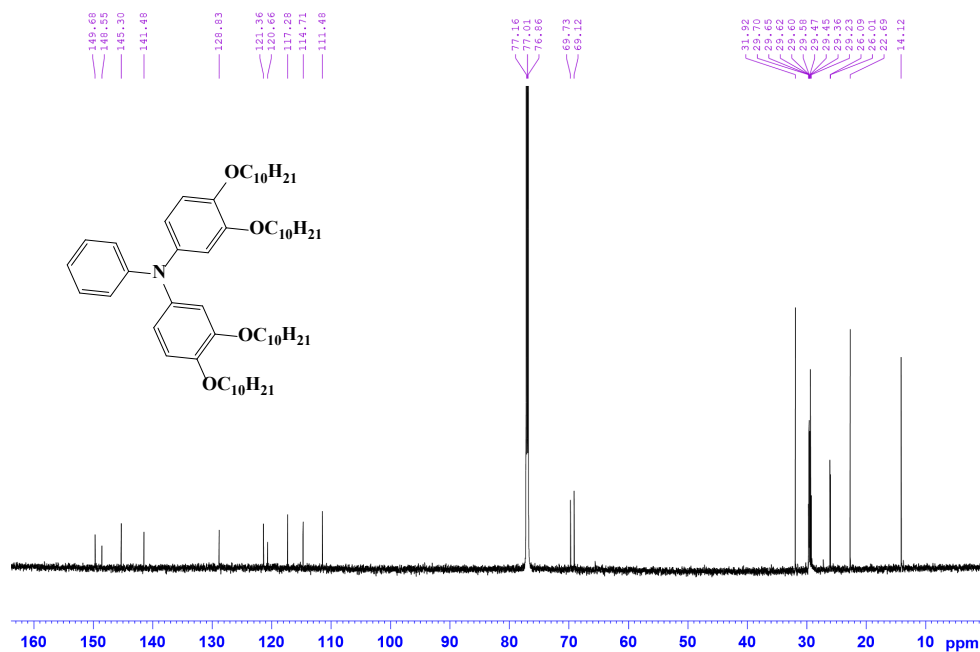

Figure S17. <sup>13</sup>C NMR (CDCl<sub>3</sub>) spectrum of compound 2.

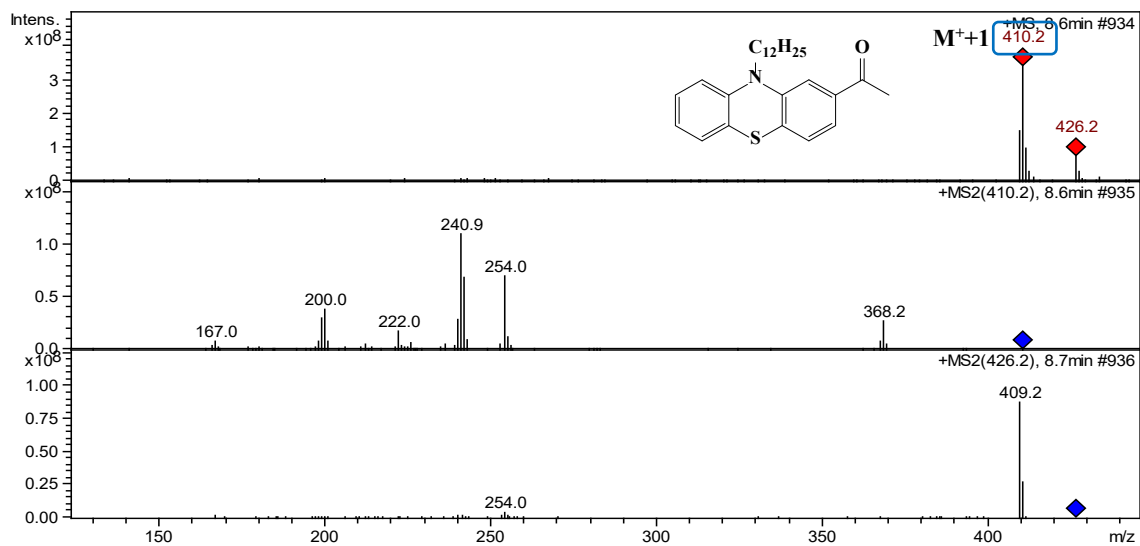

Figure S18. High resolution mass spectrum of A1.

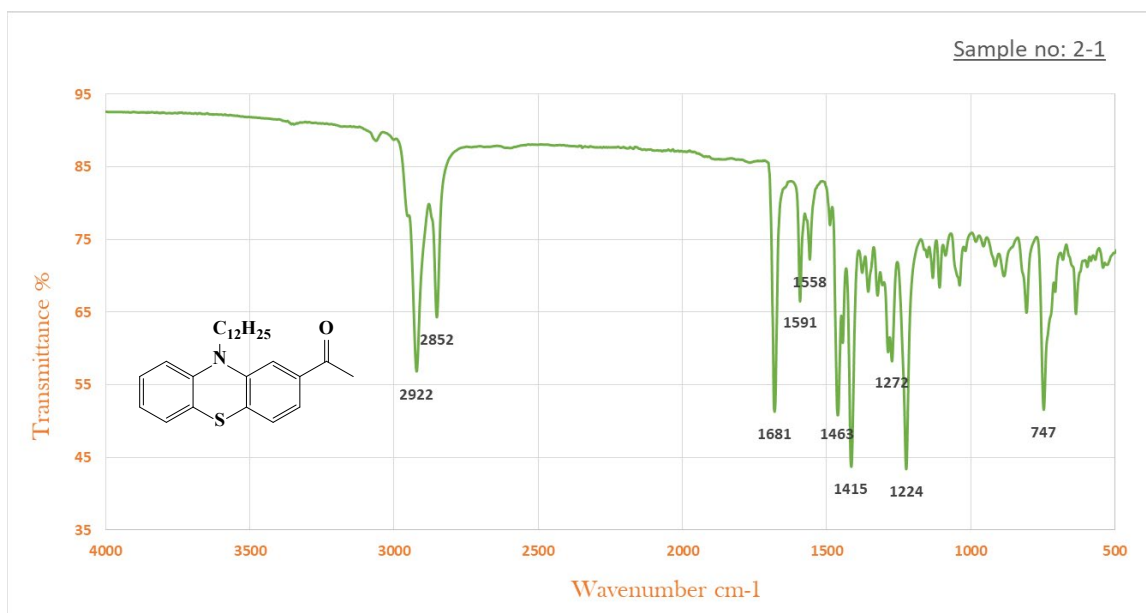

Figure S19. IR spectrum of A1.

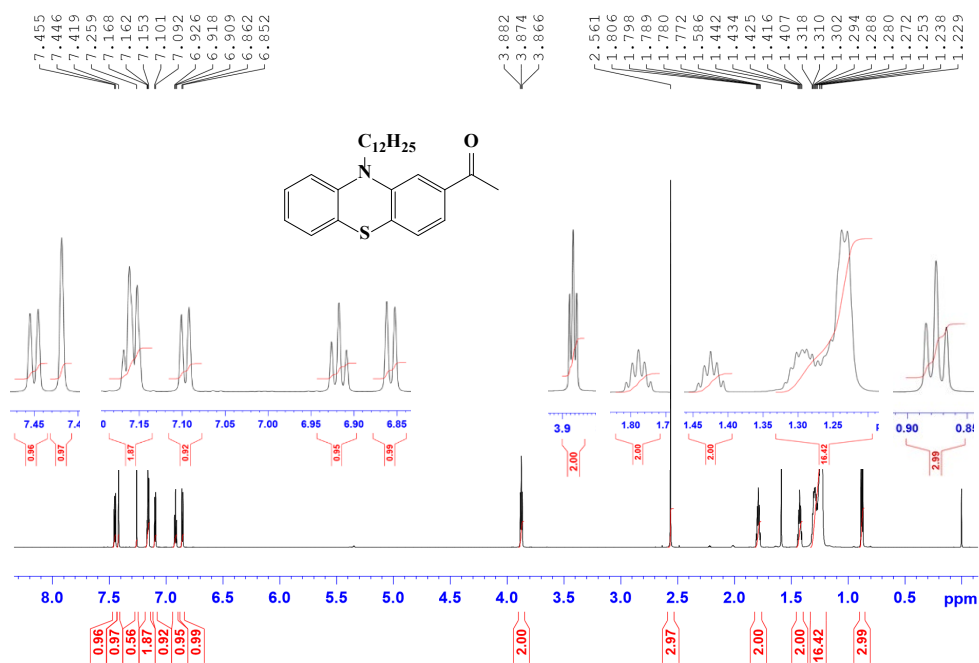

Figure S20. <sup>1</sup>H NMR (CDCl<sub>3</sub>) spectrum of A1.

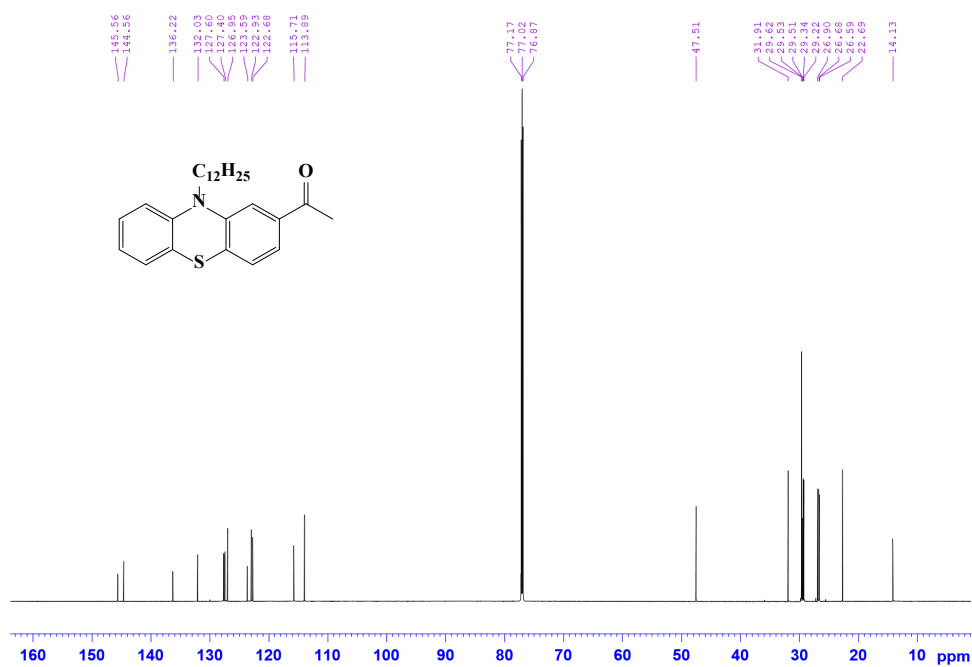

Figure S21.  $^{13}\text{C}$  NMR (CDCl<sub>3</sub>) spectrum of A1.

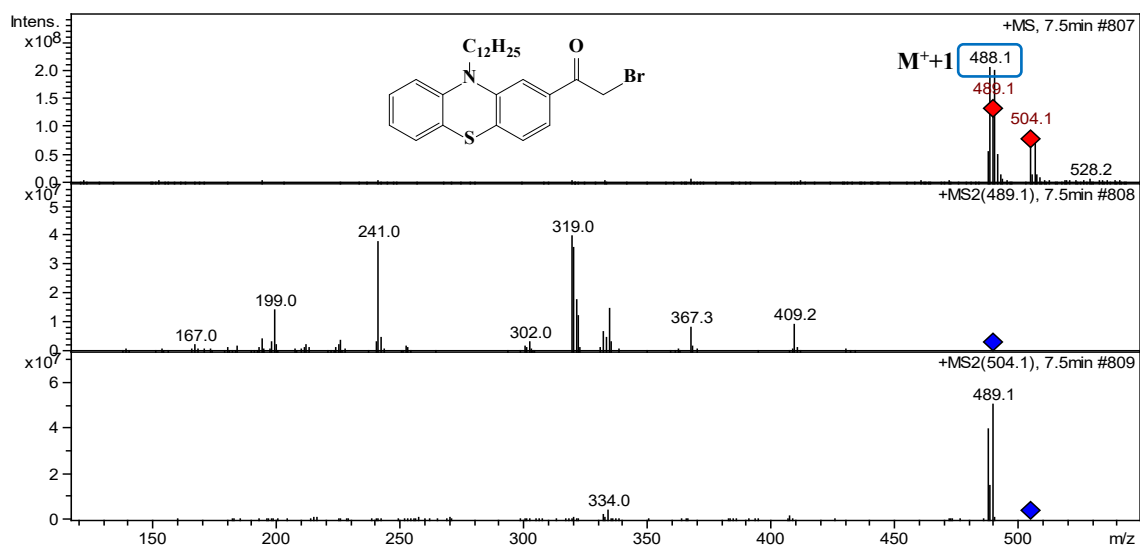

Figure S22. Mass spectrum of A2.

Sample no: 2-2

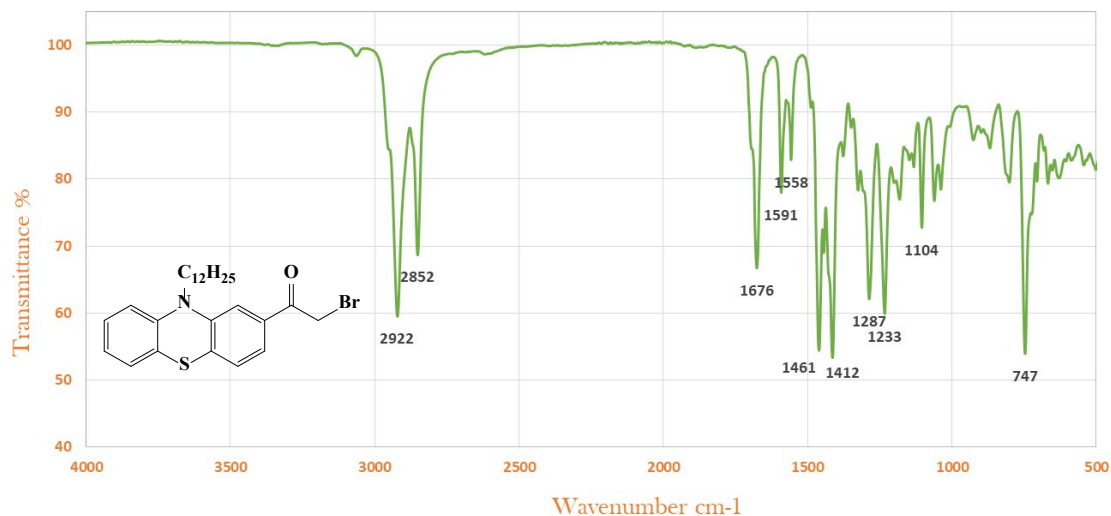

Figure S23. IR spectrum of A2.

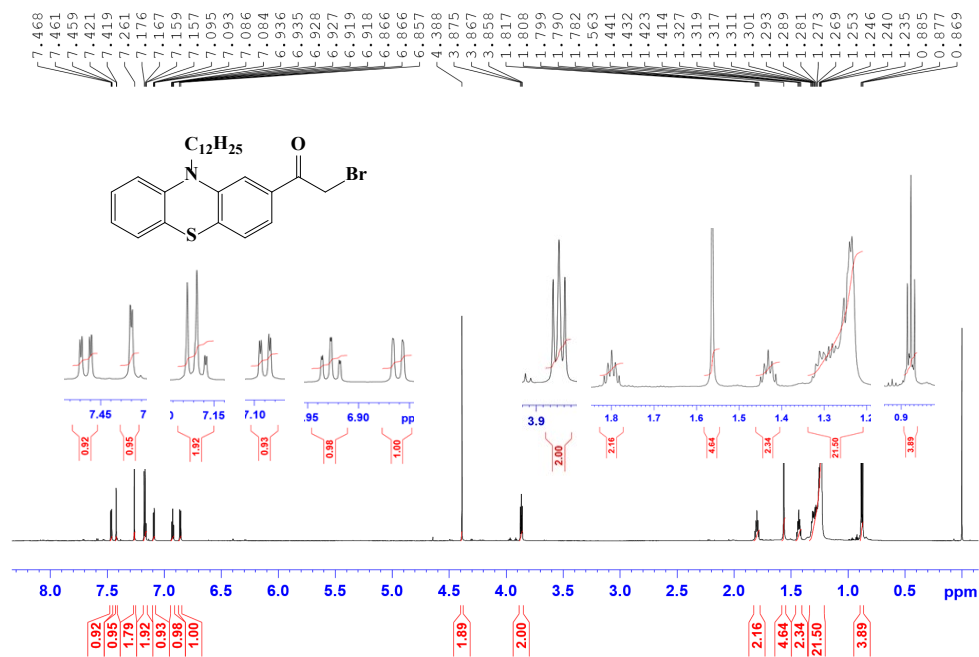

Figure S24. <sup>1</sup>H NMR (CDCl<sub>3</sub>) spectrum of A2.

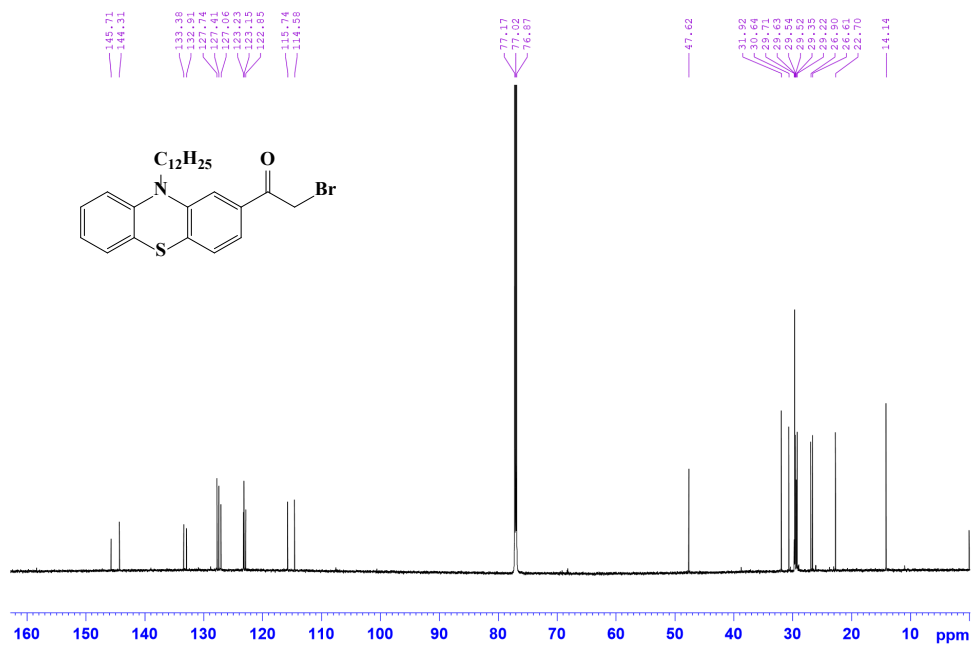

Figure S25. <sup>13</sup>C NMR (CDCl<sub>3</sub>) spectrum of A2.

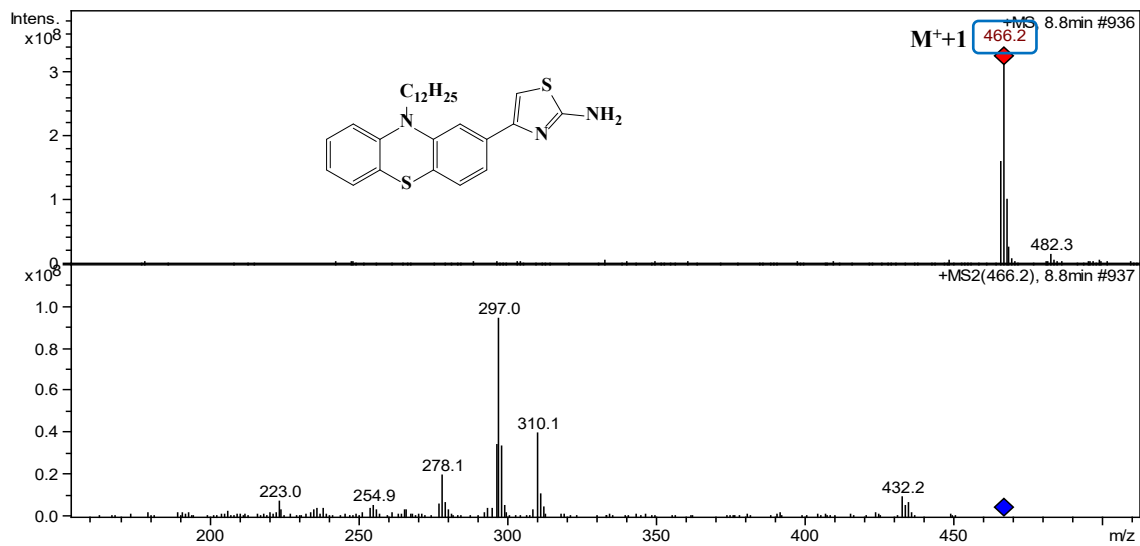

Figure S26. Mass spectrum of A3.

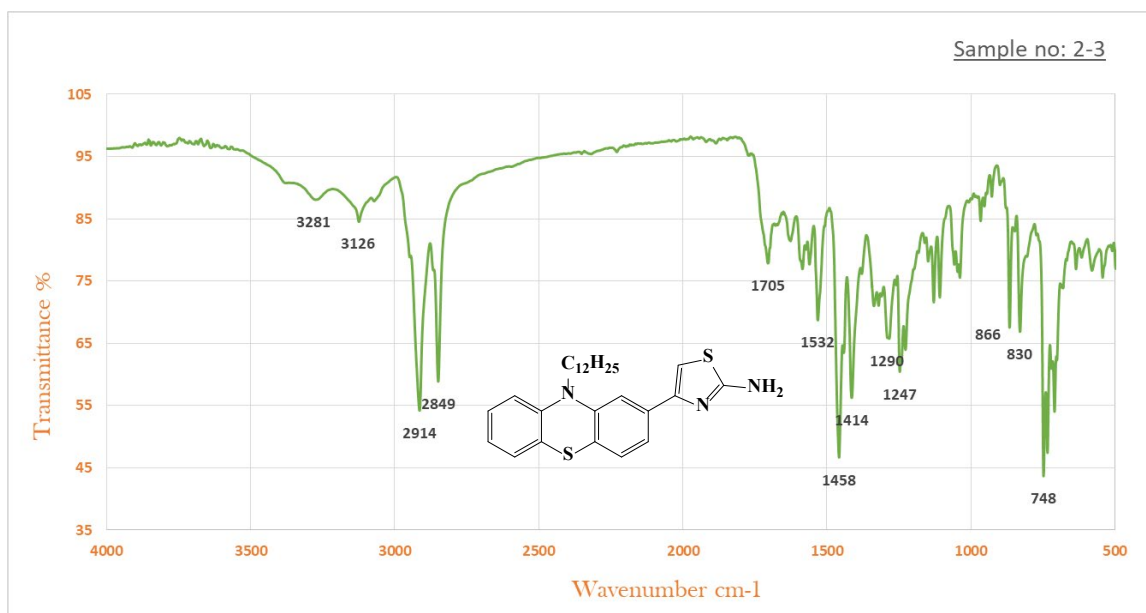

Figure S27. IR spectrum of A3.

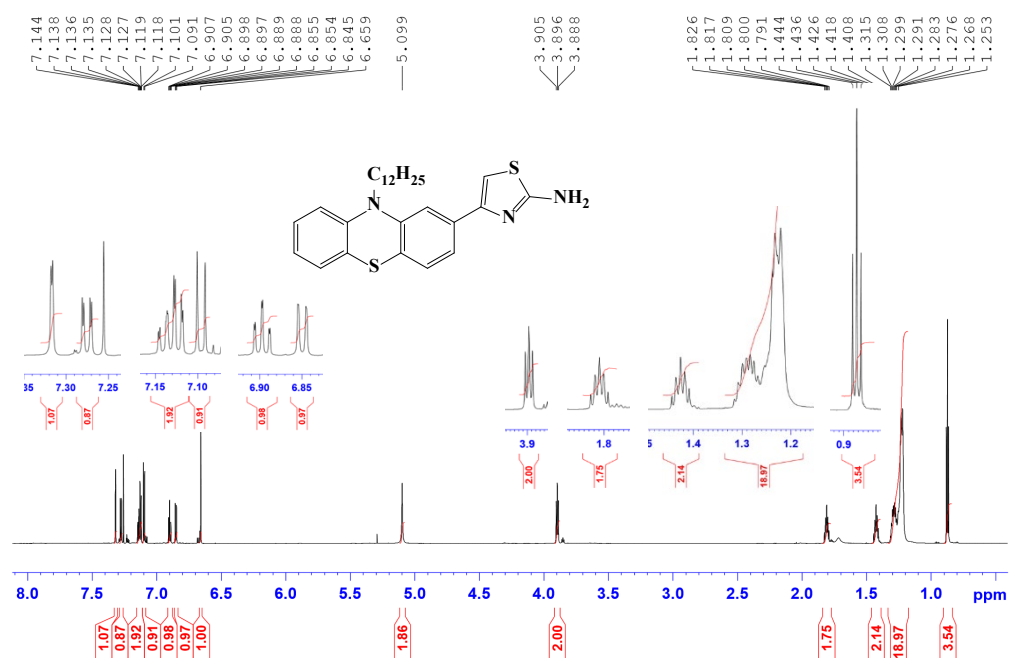

Figure S28.  $^1\text{H}$  NMR ( $\text{CDCl}_3$ ) spectrum of A3.

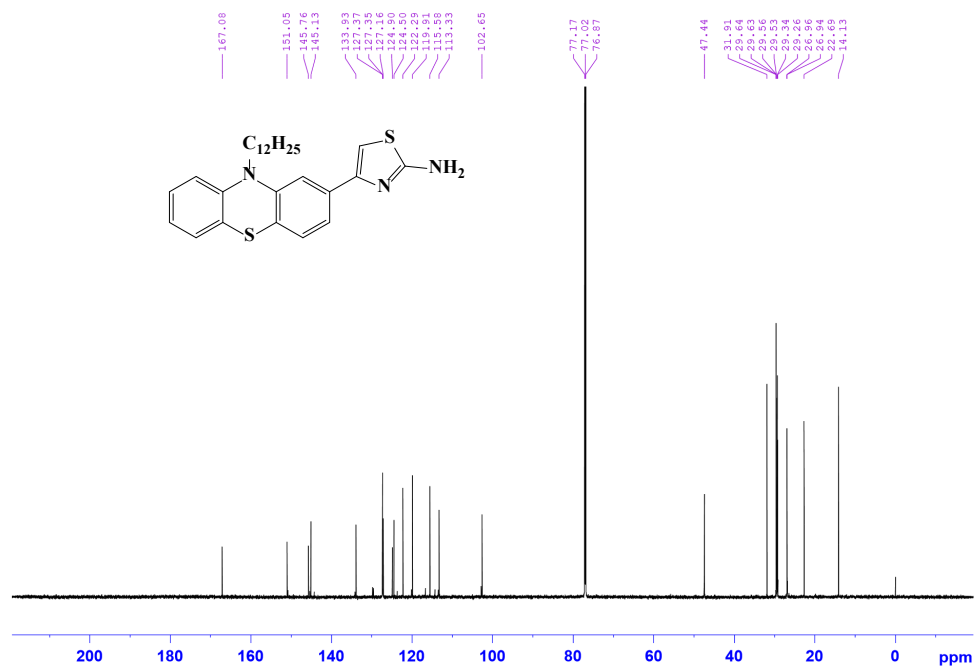

**Figure S29.** <sup>13</sup>C NMR (CDCl<sub>3</sub>) spectrum of A3.



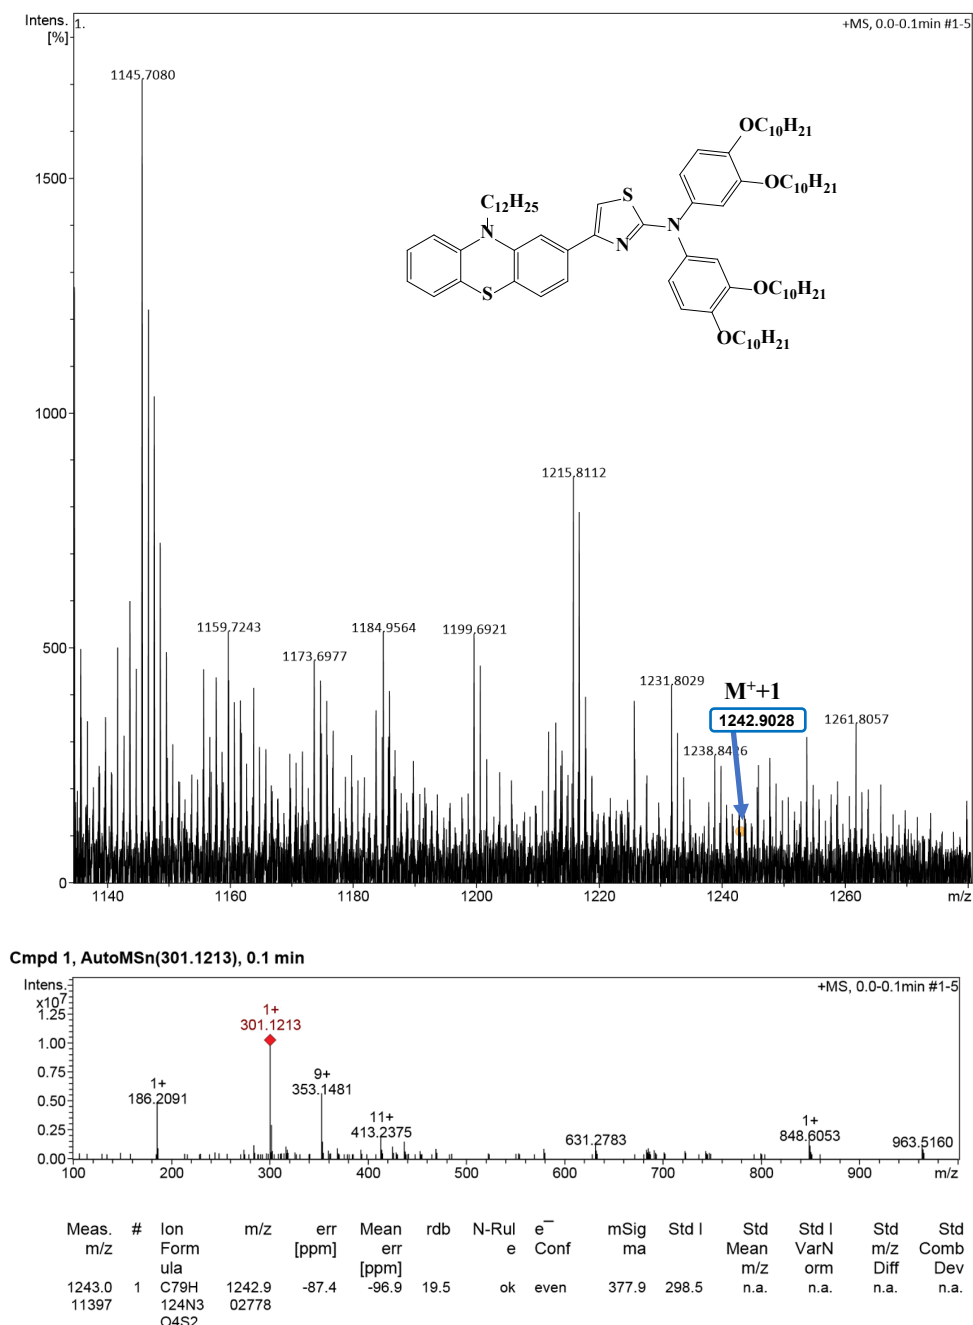

**Figure S30.** High resolution mass spectrum of **compound 3**.

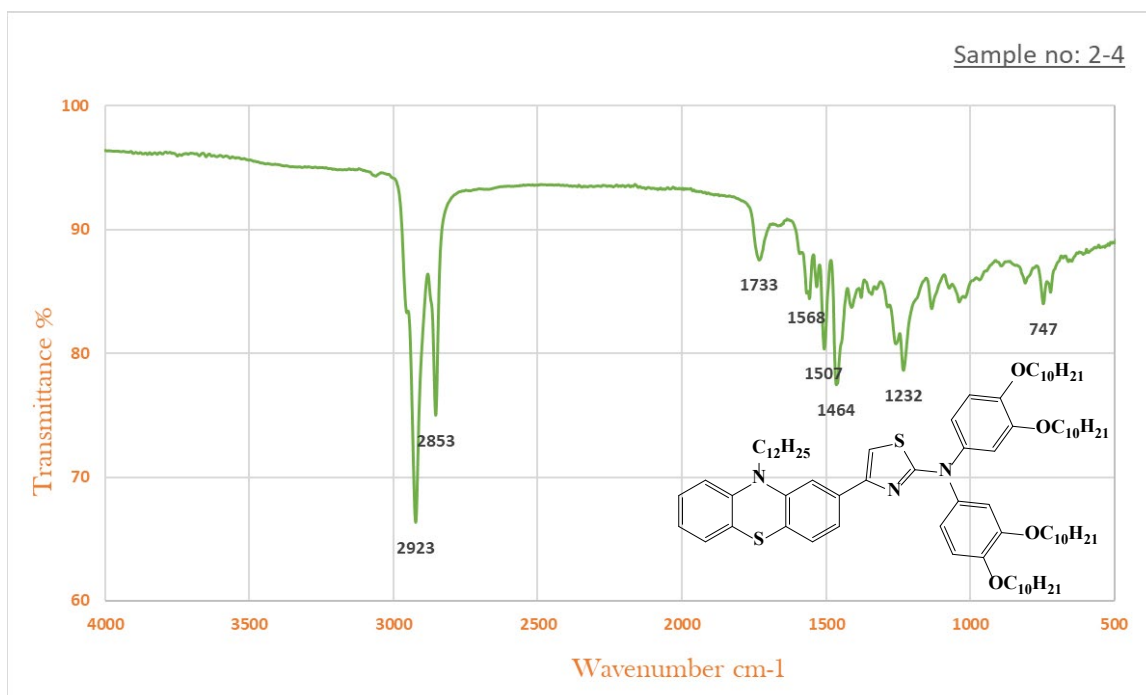

Figure S31. IR spectrum of compound 3.

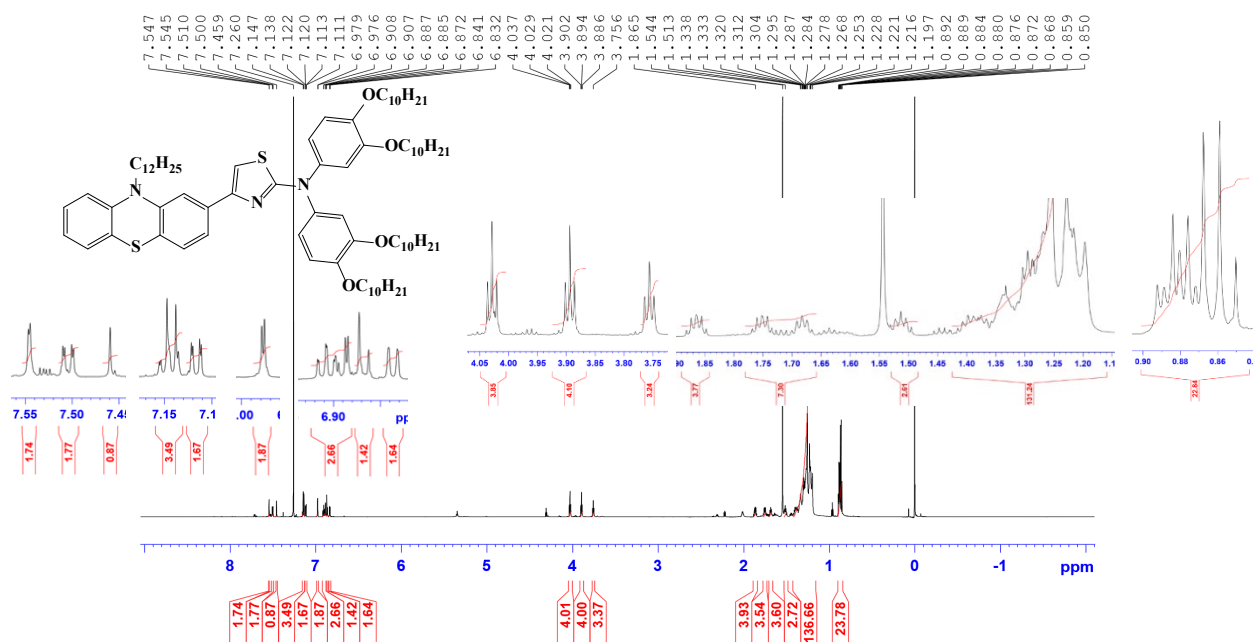

Figure S32.  $^1\text{H}$  NMR ( $\text{CDCl}_3$ ) spectrum of compound 3.

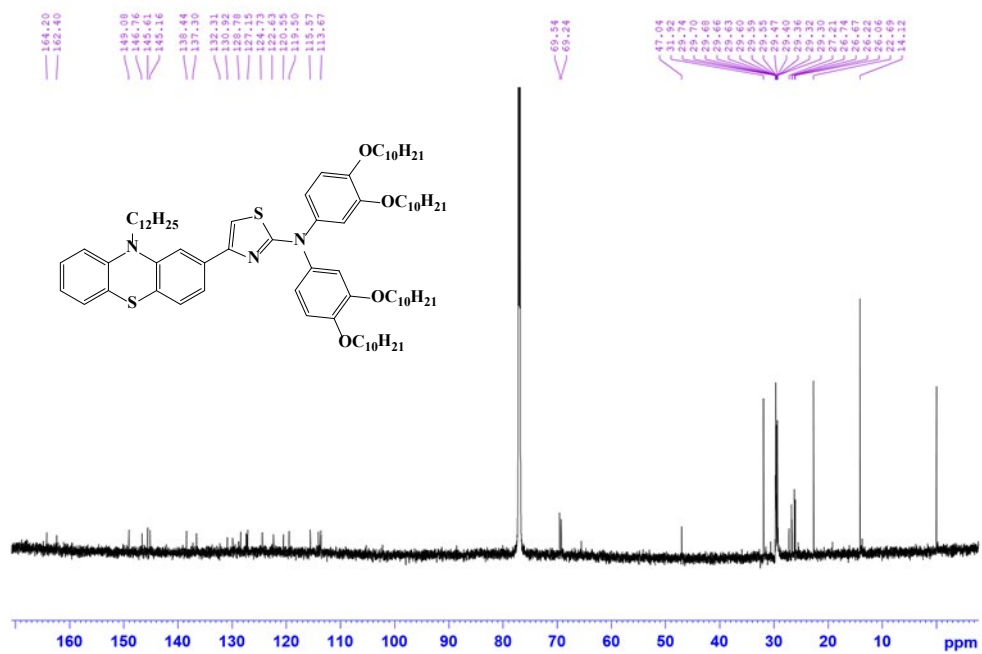

**Table S1.** UV-Vis Absorption properties of **Compounds 1, 2, and 3.**

| Molecules  | $\lambda_1$ | $\lambda_2$ | $\lambda_3$       |
|------------|-------------|-------------|-------------------|
| Compound 1 | 229         | 300         | -                 |
| Compound 2 | 229         | 299         | -                 |
| Compound 3 | 229         | 256         | 292<br>(Shoulder) |

**Table S2.** Bond lengths and dihedral angles of three compounds

|                                | Compound 1 | Compound 2 | Compound 3 |
|--------------------------------|------------|------------|------------|
| <b>Bond lengths (Å)</b>        |            |            |            |
| L <sub>1</sub> -L <sub>2</sub> | 1.4246     | 1.4231     | 1.4360     |
| L <sub>1</sub> -L <sub>3</sub> | 1.4215     | 1.4201     | 1.3796     |
| L <sub>1</sub> -L <sub>4</sub> | 1.4201     | 1.4234     | 1.4329     |
| L <sub>5</sub> -L <sub>6</sub> | /          | /          | 1.4767     |
| <b>Dihedral angles (°)</b>     |            |            |            |
| $\phi_1$                       | 41.6702    | 42.1668    | 16.3468    |
| $\phi_2$                       | 39.8371    | 45.1419    | 46.0301    |
| $\phi_3$                       | 46.2855    | 44.2488    | 60.1911    |
| $\phi_4$                       | /          | /          | 6.9894     |

**Table S3.** Contribution with Partial density of states analysis.

| Molecules   | Orbitals | A   | B   | C   | N   | D   |
|-------------|----------|-----|-----|-----|-----|-----|
| Compounds 1 | HOMO     | 29% | 22% | 22% | 26% | -   |
|             | LUMO     | 33% | 25% | 41% | 0%  | -   |
| Compounds 2 | HOMO     | 28% | 27% | 21% | 25% | -   |
|             | LUMO     | 15% | 29% | 55% | 1%  | -   |
| Compounds 3 | HOMO     | 4%  | 6%  | 24% | 7%  | 60% |
|             | LUMO     | 3%  | 2%  | 44% | 1%  | 50% |

**Table S4.** The Vertical excitation energy (cm<sup>-1</sup>), Absorption peak (nm), Oscillator strengths (*f*), Electron transitions and excited-state lifetime  $\tau_2$  (ns) of three investigated molecules.

| <b>Molecules</b>  | <b>State</b> | <b>Energy</b> | <b><math>\lambda</math></b> | <b><i>f</i></b> | <b>CI</b>       | <b><math>\tau_2</math></b> |
|-------------------|--------------|---------------|-----------------------------|-----------------|-----------------|----------------------------|
| <b>Compound 1</b> | S1           | 36013.97342   | 277.67                      | 0.2767          | H-<br>L/0.66564 | 4.17686                    |
| <b>Compound 2</b> | S1           | 35953.11714   | 278.14                      | 0.3412          | H-<br>L/0.64282 | 3.39875                    |
| <b>Compound 3</b> | S1           | 33034.91791   | 302.71                      | 0.1619          | H-<br>L/0.57662 | 8.48415                    |
